# Supplementary material for: Positional isomerism effect of spirobifluorene and terpyridine moieties of “(A)n–D–(A)n” type electron transport materials for long-lived and highly efficient TADF-PhOLEDs
Source: Royal Society of Chemistry journal article supplement (doi:10.1039/c8tc03796e), 2018-01-01
Supplement: c8tc03796e1.pdf [file c8tc03796e1.pdf]

## Supporting Information

### Positional Isomerism Effect of Spirobifluorene and Terpyridine Moieties of “(A)<sub>n</sub>-D-(A)<sub>n</sub>” Type Electron Transport Materials for Long-lived and Highly efficient TADF-PhOLED

Mengying Bian, Yuanxun Wang, Xuan Guo, Fang Lv, Zhijian Chen, Lian Duan, Zuqiang Bian, Zhiwei Liu,\* Hua Geng,\* Lixin Xiao\*

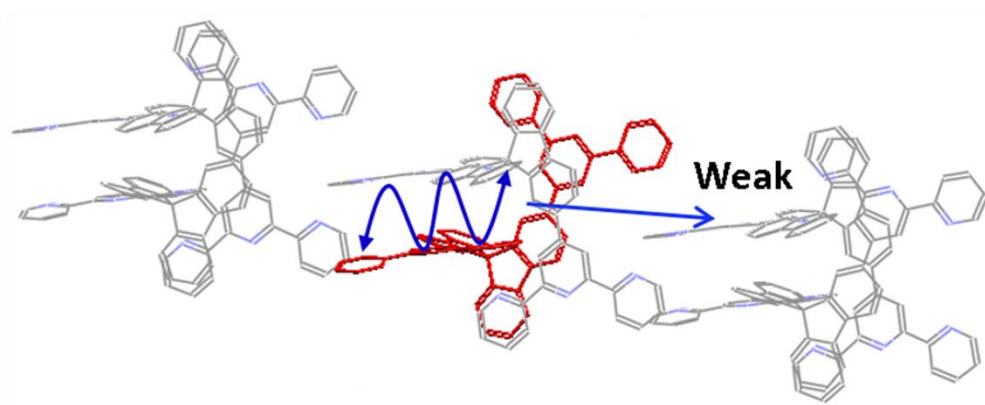

**Figure S1.** the charge of 22-TPSF oscillate mainly between the two molecules.

Sample: 2.2TPSF  
Size: 2.2330 mg  
Method: RAMP10K/MIN,N2  
Comment: ZHONGYAOXIAN

### DSC-TGA

File: E:\STAFF\201401\Q600-140113-B.001  
Operator: CHEM.PKU  
Run Date: 13-Jan-2014 11:02  
Instrument: SDT Q600 V20.9 Build 20

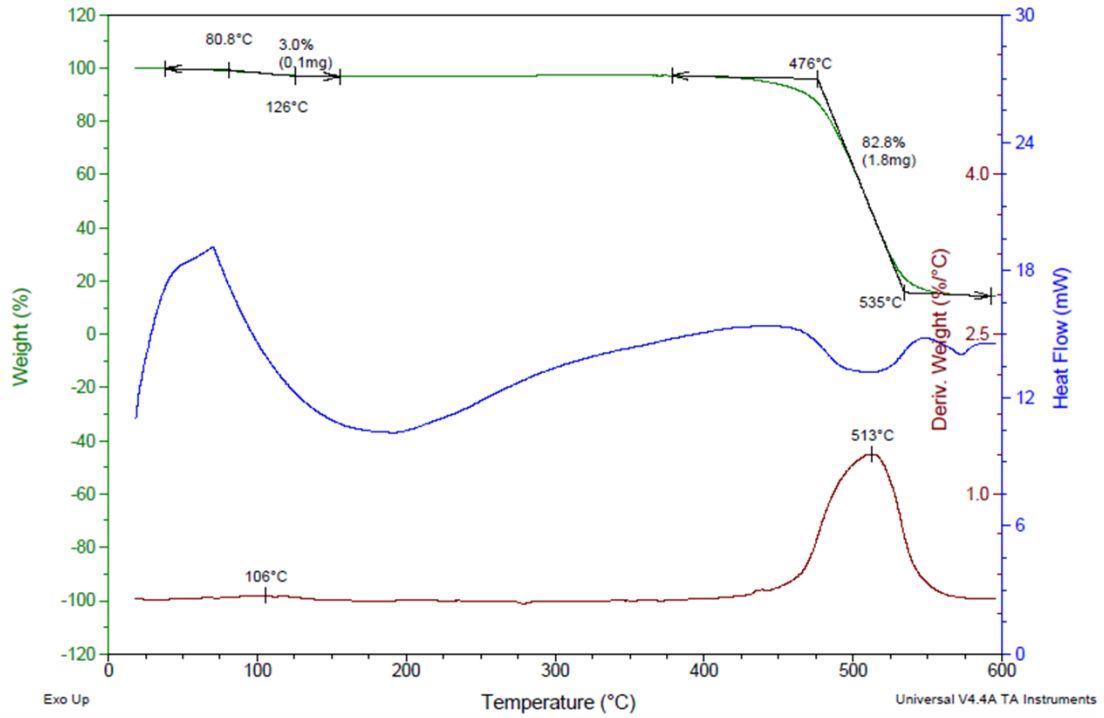

Figure S2. The TGA of 22-TPSF.

Sample: 2.2TPSF  
Size: 1.7600 mg  
Method: RAMP10K/MIN,N2  
Comment: ZHONGYAOXIAN

### DSC

File: D:\STAFF\201503\Q100-150306-C.001  
Operator: CHEM.PKU  
Run Date: 06-Mar-2015 10:48  
Instrument: DSC Q100 V9.9 Build 303

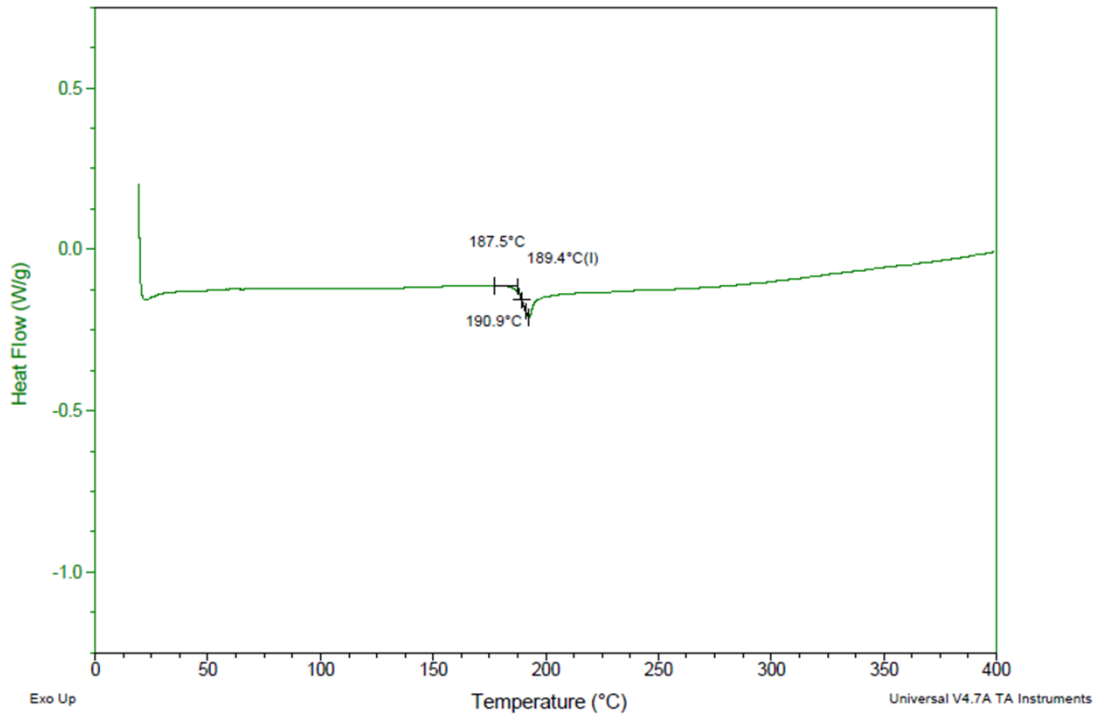

Figure S3. The DSC of 22-TPSF.

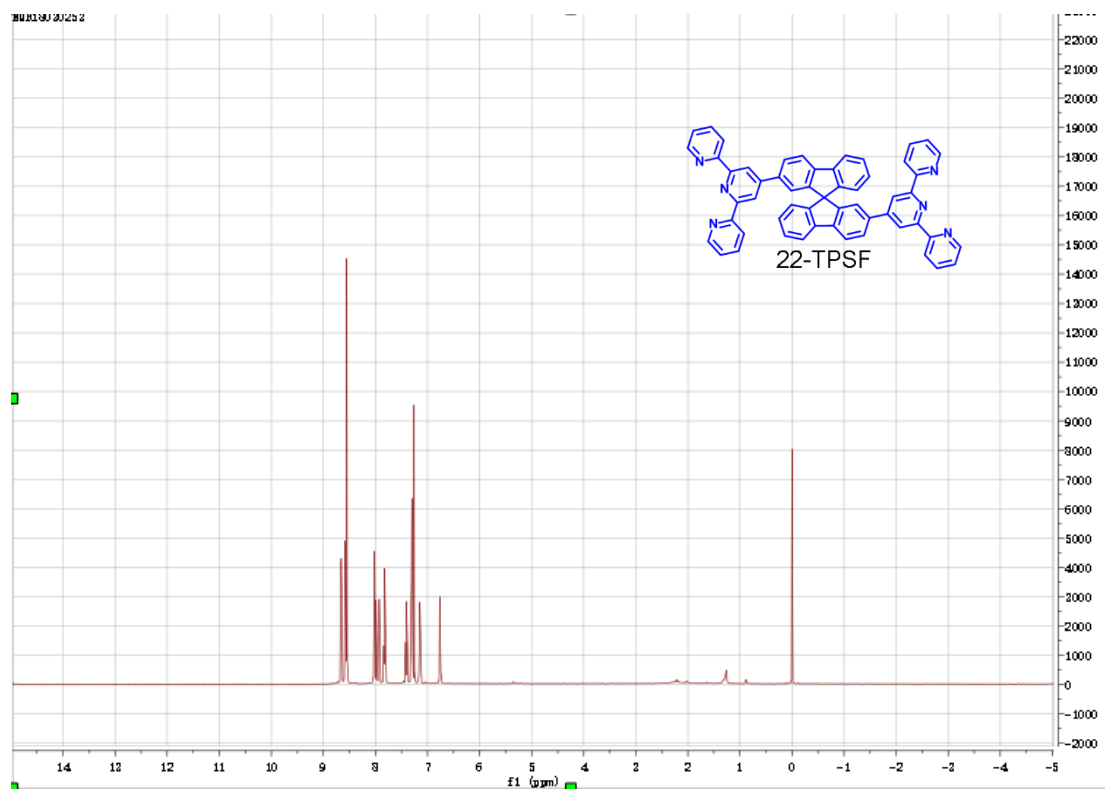

**Figure S4.** The <sup>1</sup>H NMR spectrum of 22-TPSF.

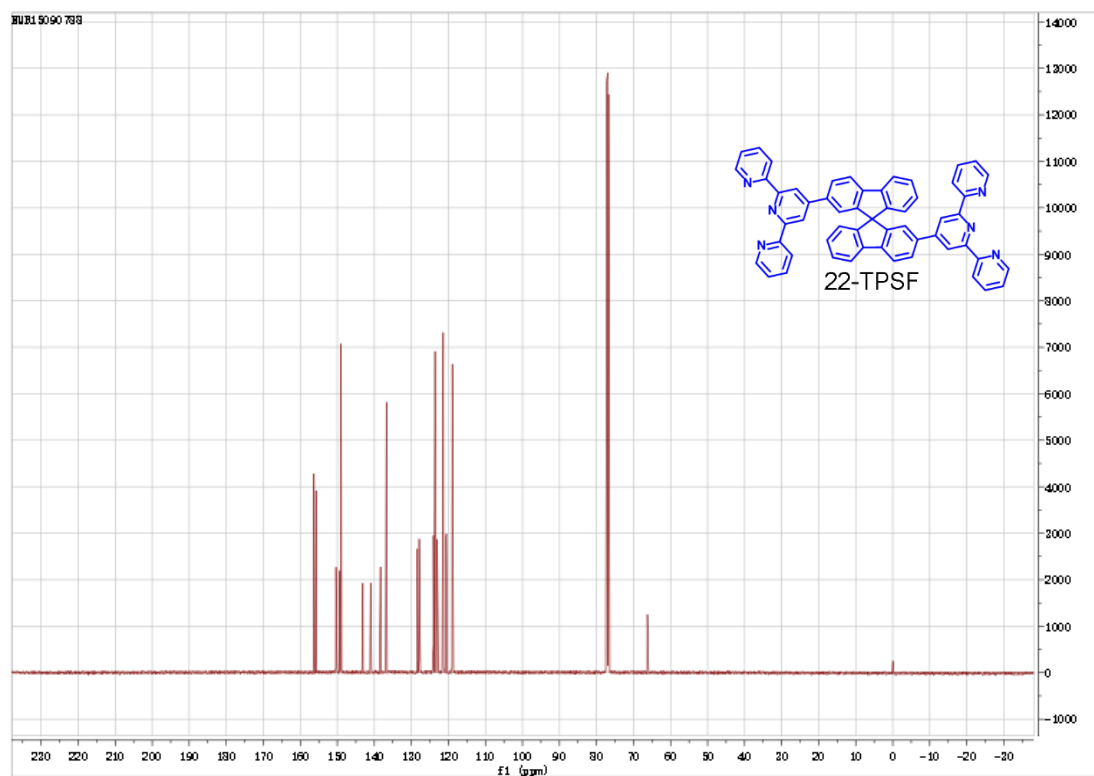

**Figure S5.** The <sup>13</sup>C NMR spectrum of 22-TPSF.

Peking University Mass Spectrometry Sample Analysis Report

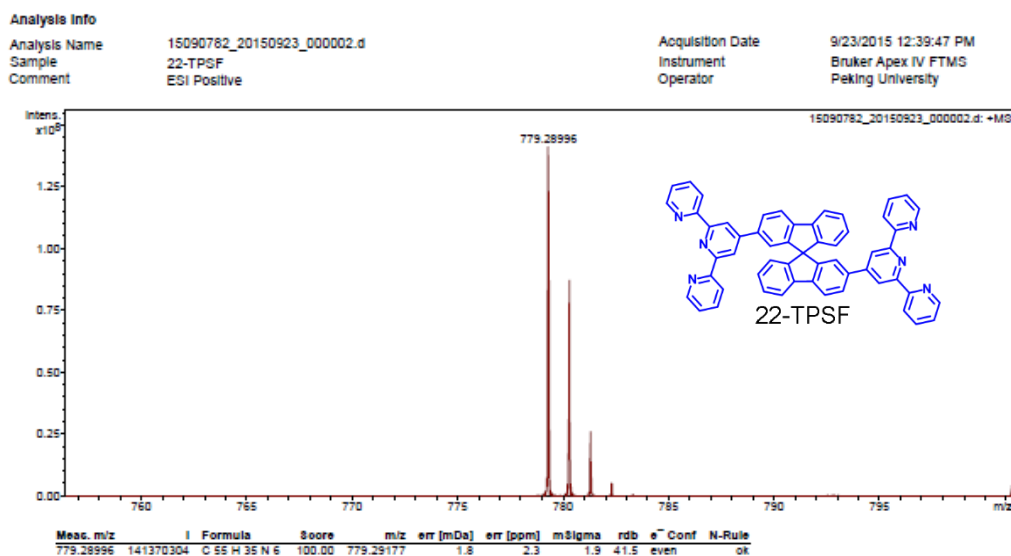

**Figure S6.** The HRMS spectrum of 22-TPSF.

**Table S1.** Summary of the crystal data for 22-TPSF.

|                                            |                                                |
|--------------------------------------------|------------------------------------------------|
| Parameter                                  | 22-TPSF                                        |
| Empirical formula                          | C <sub>55</sub> H <sub>34</sub> N <sub>6</sub> |
| Formula weight [g mol <sup>-1</sup> ]      | 778.92                                         |
| Temperature [K]                            | 180                                            |
| Wavelength [Å]                             | 0.71073                                        |
| Crystal system                             | Monoclinic                                     |
| Space group                                | P 21/n                                         |
| Crystal color and size [mm <sup>-3</sup> ] | Colorless, 0.35 × 0.2 × 0.15                   |
| <i>a</i> [Å]                               | 16.5689 (5)                                    |
| <i>b</i> [Å]                               | 35.4714 (9)                                    |
| <i>c</i> [Å]                               | 16.5839 (5)                                    |
| $\alpha$ [°]                               | 90                                             |

|                                            |                                  |
|--------------------------------------------|----------------------------------|
| $\beta$ [°]                                | 107.626 (3)                      |
| $\gamma$ [°]                               | 90                               |
| Volume [Å <sup>3</sup> ]                   | 9289.1 (5)                       |
| Z                                          | 4                                |
| Density, calcd [g cm <sup>-3</sup> ]       | 1.175                            |
| Absorption coefficient [mm <sup>-1</sup> ] | 0.125                            |
| $F(000)$                                   | 3416.0                           |
| $\theta$ range for data collection [°]     | 1.727 to 25.027                  |
| Reflections collected                      | 54830                            |
| Independent reflections                    | 16408                            |
| $R_{\text{int}}$                           | 0.0342                           |
| Restraints / parameters                    | 0/1126                           |
| Goodness-of-fit on $F^2$                   | 1.019                            |
| Final R indices [ $I > 2\sigma(I)$ ]       | $R_1 = 0.0965$ , $wR_2 = 0.2167$ |
| R indices (all data)                       | $R_1 = 0.1088$ , $wR_2 = 0.2225$ |

**Table S2.** Summary of the crystal data for 27-TPSF.

|                                            |                                                |
|--------------------------------------------|------------------------------------------------|
| Parameter                                  | 27-TPSF                                        |
| Empirical formula                          | C <sub>55</sub> H <sub>34</sub> N <sub>6</sub> |
| Formula weight [g mol <sup>-1</sup> ]      | 778.92                                         |
| Temperature [K]                            | 180                                            |
| Wavelength [Å]                             | 0.71073                                        |
| Crystal system                             | Monoclinic                                     |
| Space group                                | C 2/c                                          |
| Crystal color and size [mm <sup>-3</sup> ] | Colorless, 0.6×0.5×0.02                        |
| $a$ [Å]                                    | 19.5621 (10)                                   |
| $b$ [Å]                                    | 24.2721 (18)                                   |
| $c$ [Å]                                    | 12.7702 (7)                                    |
| $\alpha$ [°]                               | 90                                             |

|                                            |                                  |
|--------------------------------------------|----------------------------------|
| $\beta$ [°]                                | 129.729 (5)                      |
| $\gamma$ [°]                               | 90                               |
| Volume [Å <sup>3</sup> ]                   | 4663.3 (6)                       |
| Z                                          | 4                                |
| Density, calcd [g cm <sup>-3</sup> ]       | 1.351                            |
| Absorption coefficient [mm <sup>-1</sup> ] | 0.301                            |
| $F(000)$                                   | 1960.0                           |
| $\theta$ range for data collection [°]     | 2.668 to 23.253                  |
| Reflections collected                      | 12016                            |
| Independent reflections                    | 3351                             |
| $R_{\text{int}}$                           | 0.0416                           |
| Restraints / parameters                    | 2/303                            |
| Goodness-of-fit on $F^2$                   | 1.042                            |
| Final R indices [ $I > 2\sigma(I)$ ]       | $R_1 = 0.1018$ , $wR_2 = 0.2208$ |
| R indices (all data)                       | $R_1 = 0.1371$ , $wR_2 = 0.2426$ |

**Table S3.** The calculated transfer integral of hole and electron at B3LYP/6-31G(d) level, the centroids and the nearest distance of different molecule for 22-TPSF.

|            | Hole/meV | Electron/meV | Centroids/Å | Nearest distance/Å |
|------------|----------|--------------|-------------|--------------------|
| <b>P1</b>  | -80.259  | -42.204      | 1.194       | 3.159              |
| <b>P2</b>  | 0.004    | 0.467        | 16.459      | 2.529              |
| <b>P3</b>  | 0.023    | 0.690        | 16.793      | 3.596              |
| <b>P4</b>  | 0.000    | 0.804        | 16.584      | 3.273              |
| <b>P5</b>  | 0.000    | 0.805        | 16.584      | 3.273              |
| <b>P6</b>  | 0.025    | -1.846       | 16.595      | 3.754              |
| <b>P7</b>  | 0.000    | 0.001        | 19.5741     | 4.551              |
| <b>P8</b>  | 0.000    | 0.001        | 19.5741     | 4.551              |
| <b>P9</b>  | 0.000    | -0.003       | 16.6283     | 6.957              |
| <b>P10</b> | 0.000    | 0.000        | 16.5689     | 6.151              |

|            |       |       |         |       |
|------------|-------|-------|---------|-------|
| <b>P11</b> | 0.000 | 0.000 | 16.5689 | 6.058 |
|------------|-------|-------|---------|-------|

**Table S4.** The calculated transfer integral of hole and electron at B3LYP/6-31G(d) level, the centroids and the nearest distance of different molecule for 27-TPSF.

|                           | <b>P1</b> | <b>P2</b> | <b>P3</b> | <b>P4</b> | <b>P5</b> | <b>P6</b> |
|---------------------------|-----------|-----------|-----------|-----------|-----------|-----------|
| <b>Hole/meV</b>           | -0.048    | 0.048     | 0.127     | 0.127     | 0.000     | 0.000     |
| <b>Electron/meV</b>       | -8.846    | 8.846     | 0.149     | 0.149     | 0.000     | -0.000    |
| <b>Centroids/Å</b>        | 19.562    | 19.562    | 15.056    | 15.056    | 12.770    | 12.770    |
| <b>Nearest distance/Å</b> | 4.146     | 4.146     | 2.264     | 2.264     | 3.334     | 3.334     |
